# Supplementary material for: In-Solution Conformational Analysis of the XCYCH3 Moiety for Small Esters and Ethers with all Combinations of X, Y = O, S
Source: Molecules. 2013 Jul 8;18(7):8063–82. doi: 10.3390/molecules18078063 (PMC6270607; doi:10.3390/molecules18078063)
Supplement: Supplementary file 1 [file molecules-18-08063-s001.pdf]

## Supplementary Materials

**Table S1.** Geometric parameters optimized at the B97D/aug-cc-pv(T+d)z levels for *O*-methyl ethanethioate (*O*-methyl thioacetic acid) and dithioacetic acid methyl ester <sup>a</sup>.

|                                                      | Gas                       | CHCl <sub>3</sub> | CH <sub>3</sub> CN |
|------------------------------------------------------|---------------------------|-------------------|--------------------|
| <b>CH<sub>3</sub>CSOCH<sub>3</sub>, <i>cis</i></b>   |                           |                   |                    |
| C-C                                                  | 1.509                     | 1.507             | 1.506              |
| C=S                                                  | 1.643                     | 1.650             | 1.654              |
| C-O                                                  | 1.345(1.375) <sup>b</sup> | 1.338(1.368)      | 1.335(1.367)       |
| O-CH <sub>3</sub>                                    | 1.447                     | 1.451             | 1.453              |
| C-C=S                                                | 125.1                     | 124.9             | 124.8              |
| S=C-O                                                | 125.7                     | 125.5             | 125.5              |
| C-O-CH <sub>3</sub>                                  | 119.1(115.4)              | 119.7(115.5)      | 120.0(115.6)       |
| <b>CH<sub>3</sub>CSOCH<sub>3</sub>, <i>trans</i></b> |                           |                   |                    |
| C-C                                                  | 1.510                     | 1.506             | 1.503              |
| C=S                                                  | 1.638                     | 1.650             | 1.655              |
| C-O                                                  | 1.353                     | 1.342             | 1.338              |
| O-CH <sub>3</sub>                                    | 1.446                     | 1.455             | 1.459              |
| C-C=S                                                | 124.2                     | 124.1             | 124.1              |
| S=C-O                                                | 118.6                     | 118.2             | 118.0              |
| C-O-CH <sub>3</sub>                                  | 120.7                     | 120.6             | 120.6              |
| <b>CH<sub>3</sub>CSSCH<sub>3</sub>, <i>cis</i></b>   |                           |                   |                    |
| C-C                                                  | 1.518                     | 1.517             | 1.516              |
| C=S                                                  | 1.643                     | 1.650             | 1.653              |
| C-S                                                  | 1.747(1.830)              | 1.739(1.829)      | 1.735(1.828)       |
| S-CH <sub>3</sub>                                    | 1.811                     | 1.811             | 1.811              |
| C-C=S                                                | 122.6                     | 122.4             | 122.3              |
| S=C-S                                                | 126.0                     | 126.0             | 126.0              |
| C-S-CH <sub>3</sub>                                  | 104.0(97.5)               | 104.8(97.9)       | 105.1(97.9)        |
| <b>CH<sub>3</sub>CSSCH<sub>3</sub>, <i>trans</i></b> |                           |                   |                    |
| C-C                                                  | 1.510                     | 1.507             | 1.506              |
| C=S                                                  | 1.643                     | 1.653             | 1.658              |
| C-S                                                  | 1.747                     | 1.739             | 1.734              |
| S-CH <sub>3</sub>                                    | 1.832                     | 1.829             | 1.828              |
| C-C=S                                                | 124.0                     | 123.8             | 123.7              |
| S=C-S                                                | 117.9                     | 117.9             | 117.8              |
| C-S-CH <sub>3</sub>                                  | 106.2                     | 106.2             | 105.3              |

<sup>a</sup> Distances in Å, angles in degrees. *Cis* and *trans* structures correspond to S=C-X-C (X=O, S) torsional angles of ~0° and ~180°, respectively. For CH<sub>3</sub>CSOCH<sub>3</sub>, the symmetry is nearly C<sub>s</sub> in both conformations and a methyl hydrogen nearly eclipses the tiocarbonyl sulfur. The HCC=S torsional angle for the nearly in-plane H of the *cis* CH<sub>3</sub>CSSCH<sub>3</sub> ester is 172-175-177° in gas, CHCl<sub>3</sub> and CH<sub>3</sub>CN, respectively. The symmetry is practically C<sub>s</sub> for the *trans* conformer, a methyl hydrogen eclipses nearly the thiocarbonyl sulfur.

<sup>b</sup> Values in parentheses stand for parameters with largest changes in the transition state geometry of for the XCYC = 90° structures.
